# Supplementary material for: Tracking supercritical geothermal fluid distribution from continuous seismic monitoring
Source: Research Square preprint supplement (doi:10.21203/rs.3.rs-2602538/v1), 2023-02-23
Supplement: Supplementary file 1 [file d6e9ec7e6fc446a9e2d950e9.docx]

**Supplementary information for:**

**Tracking supercritical geothermal fluid distribution from continuous seismic monitoring**


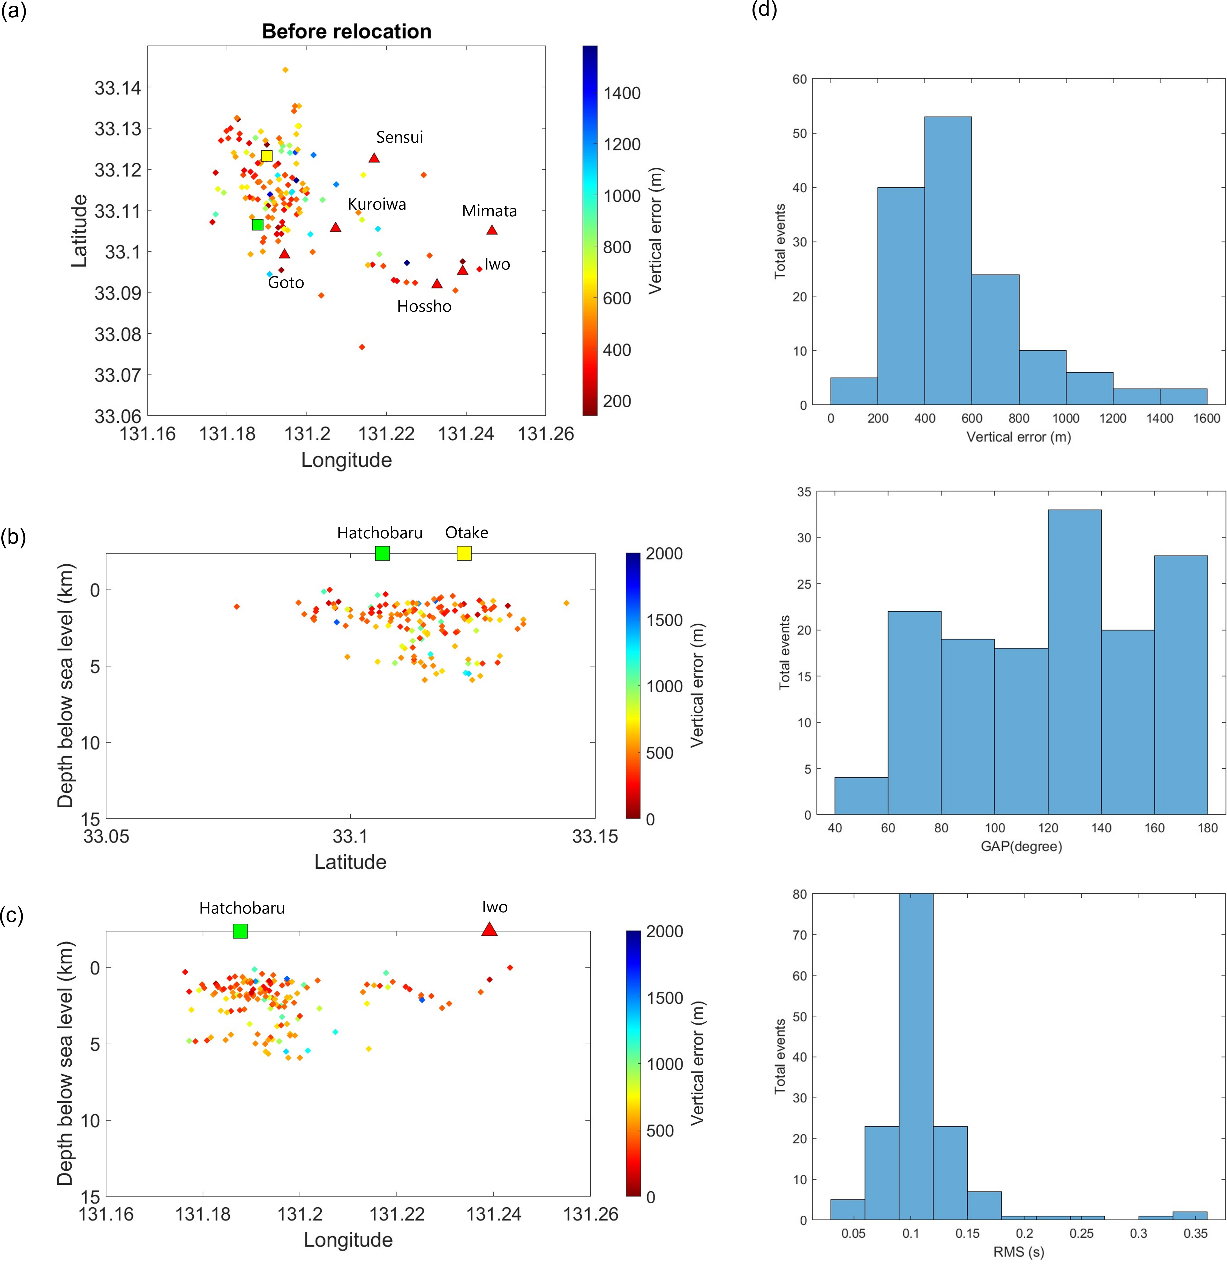


**Supplementary Figure S1.** Hypocenter results from Hypoinverse**.** (a) Plan view, (b) N–S vertical profile, and (c) E–W vertical profile of hypocenters, with colors indicating the error in vertical position. (d) Histograms showing the distribution of vertical error (ERZ), GAP, and RMS.
